# Supplementary material for: S-Phase Kinase-associated Protein-2 Rejuvenates Senescent Endothelial Progenitor Cells and Induces Angiogenesis in Vivo
Source: PubMed Central journal article supplement (PMC7171137; doi:10.1038/s41598-020-63716-y), 2020-04-20

## S-phase kinase-associated protein-2 rejuvenates senescent endothelial progenitor cells and imposes angiogenesis *in vivo*

Hsueh-Hsiao Wang<sup>2\*</sup>, Yi-Nan Lee<sup>1\*</sup>, Cheng-Huang Su<sup>1</sup>, Kuo-Tung Shu<sup>1</sup>, Wen-Ting Liu<sup>1</sup>, Chin-Ling Hsieh<sup>1</sup>, Hung-I Yeh<sup>1,2</sup>, Yih-Jer Wu<sup>1,2†</sup>

<sup>1</sup>Cardiovascular Division, Department of Internal Medicine, and Departments of Medical Research, Mackay Memorial Hospital, Taipei 10449, Taiwan.

<sup>2</sup>Department of Medicine, Mackay Medical College, New Taipei City 25245, Taiwan.

† Address correspondence to: Dr Yih-Jer Wu, Department of Medicine, Mackay Medical College, No. 46, Section 3, Jhong-Jheng Road, San-Jhih, New Taipei 25245, Taiwan.

**Fig. S1**

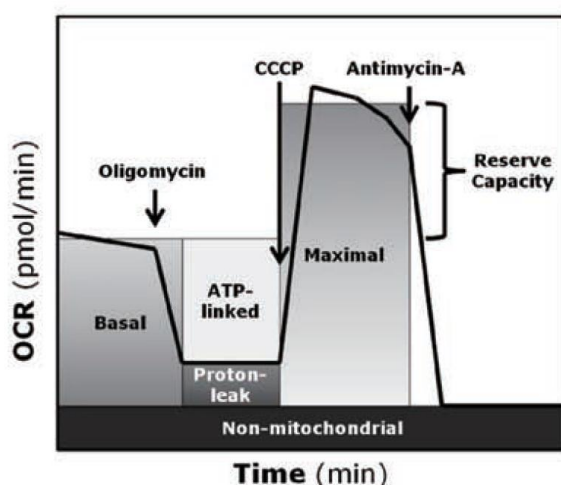

### Bioenergetics profile of EPCs

EPCs were incubated at 37 °C in a non-CO<sub>2</sub> incubator for 1 h with Customer Formulation Endothelial Cell BM MV2 (without glucose and sodium bicarbonate, c-97139, PromoCell). Initially baseline cellular OCR was measured. For parameters of mitochondria respiratory, mitochondrial inhibitors oligomycin (10 μM), protonophore carbonyl cyanide m-chlorophenyl hydrazine (CCCp (50 μM)), and antimycin-A (5 μM) (all from Sigma, St. Louis, MO, USA), were sequentially injected to inhibit ATP synthase, mitochondrial membrane potential, and electron-transport chain, respectively. OCRs were automatically calculated and recorded in real time by the Seahorse XF-24 software.

**Fig. 1B**

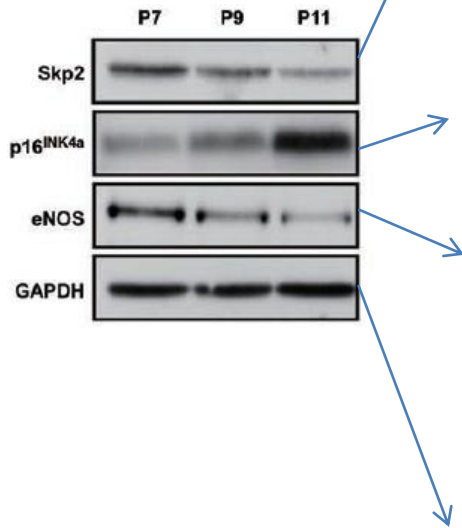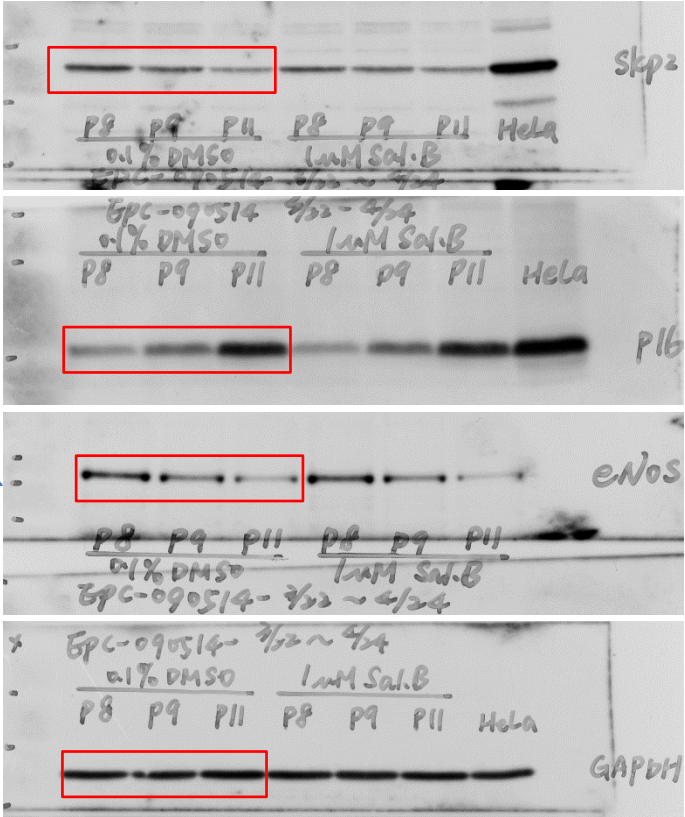

**Fig. 2A**

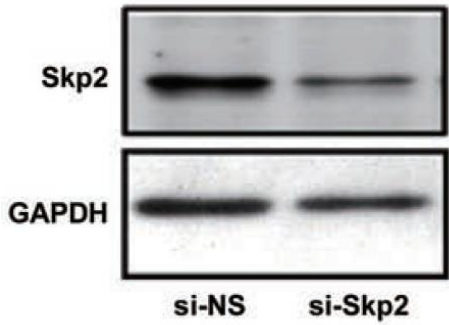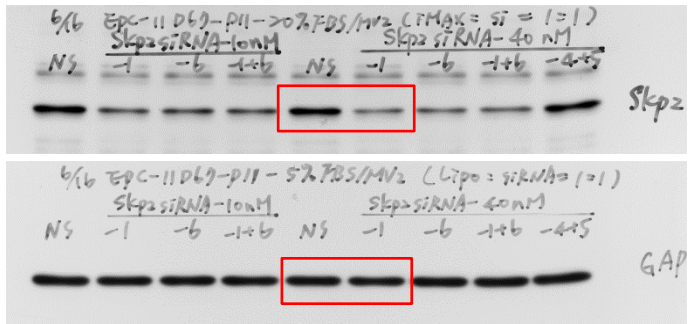

**Fig. 3E**

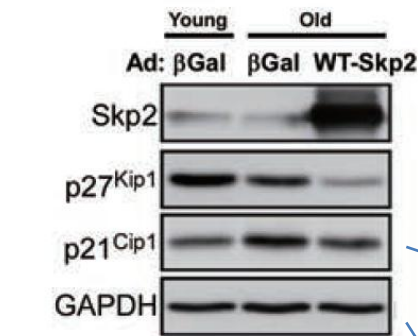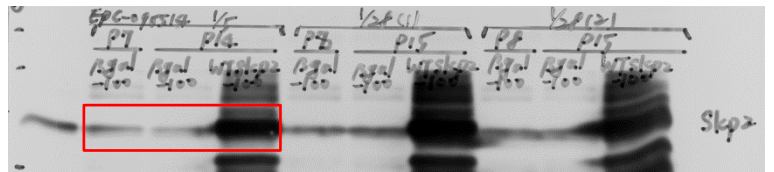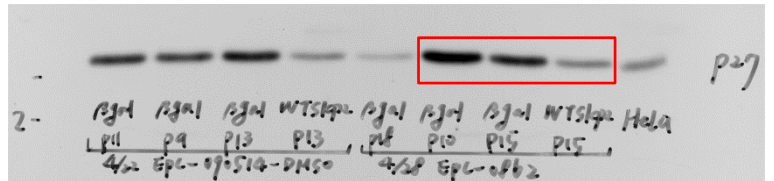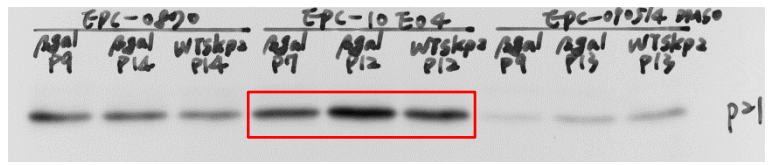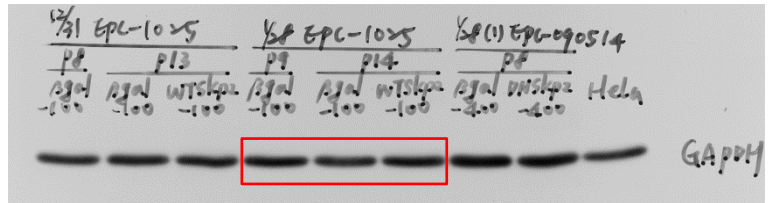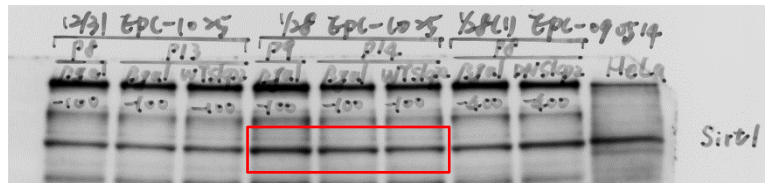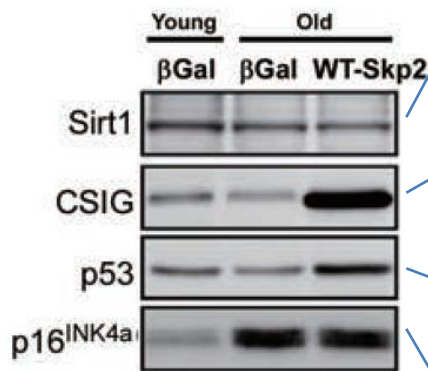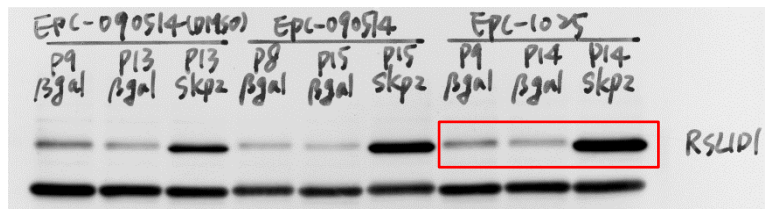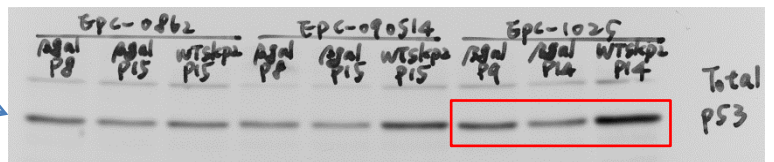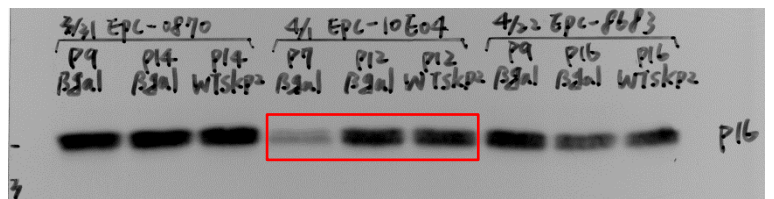

Supplement: 41598_2020_63716_MOESM1_ESM.pdf [file 41598_2020_63716_MOESM1_ESM.pdf]
